# Supplementary material
Source: Springer Nature journal article supplement (https://www.springermedizin.de/resource/supplementary/12884_2010_327_MOESM1_ESM.pdf/9457532)
Supplement: MOESM1 [file 9457532]

## Additional File 1

### Interview Participants

| <b>Organization/Affiliation</b>                                                                     | <b>Name</b>                                                              | <b>Title</b>                                                                                                                                                       | <b>Country</b> |
|-----------------------------------------------------------------------------------------------------|--------------------------------------------------------------------------|--------------------------------------------------------------------------------------------------------------------------------------------------------------------|----------------|
| <b>Aga Khan University,<br/>Department of Pediatrics &amp;<br/>Child Health</b><br><br><b>GAPPS</b> | Zulfiqar Bhutta, M.B. B.S.,<br>F.R.C.P., F.R.C.P.C.H.,<br>F.C.P.S., Ph.D | Husein Lalji Dewraj<br>Professor, Chairman<br><br>Core Investigator                                                                                                | Pakistan       |
| <b>All India Institute of Medical<br/>Sciences</b>                                                  | Vinod K. Paul, M.D., Ph.D.,<br>F.A.M.S., F.I.A.P., F.N.N.F.              | Professor of Pediatrics, Head<br>of the Division of<br>Neonatology;<br>Director of the WHO<br>Collaborating Centre for<br>Training and Research in<br>Newborn Care | India          |
| <b>Bill &amp; Melinda Gates<br/>Foundation</b><br><br><b>GAPPS</b>                                  | Gary Darmstadt, M.D.                                                     | Senior Program Officer for<br>Neonatal Health in Integrated<br>Solutions Development,<br>Global Health Program<br><br>SAC Member                                   | USA            |
| <b>Burroughs Wellcome Fund</b>                                                                      | John Burris, Ph.D.                                                       | President                                                                                                                                                          | USA            |
| <b>Burroughs Wellcome Fund</b>                                                                      | Rolly Simpson                                                            | Administrator                                                                                                                                                      | USA            |
| <b>Centers for Disease Control<br/>and Prevention (CDC)</b><br><br><b>GAPPS</b>                     | Eve Lackritz, M.D.                                                       | Chief of the Maternal and<br>Infant Health Branch, Division<br>of Reproductive Health<br><br>SAC Member                                                            | USA            |
| <b>Dartmouth Medical School</b>                                                                     | George Little, M.D.                                                      | Professor and Neonatologist                                                                                                                                        | USA            |
| <b>Engender Health</b>                                                                              | Ana Langer, M.D.                                                         | President and CEO                                                                                                                                                  | USA            |
| <b>Family Care International</b>                                                                    | Jill Sheffield, M.A.                                                     | President Emeritus and<br>Senior Advisor                                                                                                                           | USA            |
| <b>Family Care International</b>                                                                    | Ann Starrs, M.P.A.                                                       | Executive Vice President                                                                                                                                           | USA            |

| <b>Organization/Affiliation</b>                                                                              | <b>Name</b>                        | <b>Title</b>                                                            | <b>Country</b> |
|--------------------------------------------------------------------------------------------------------------|------------------------------------|-------------------------------------------------------------------------|----------------|
| <b>First Candle</b>                                                                                          | Marian Sokol, Ph.D., M.P.H.        | President                                                               | USA            |
| <b>Global Health Council</b>                                                                                 | Nils Daulaire, M.D., M.P.H.        | Former President and CEO                                                | USA            |
| <b>International Labour Organization (ILO)</b>                                                               | Naomi Cassirer, Ph.D.              | Technical Specialist with the Conditions of Work and Employment Program | Switzerland    |
| <b>International Stillbirth Alliance<br/>Centre for Clinical Studies, the Mater Mother's Hospital</b>        | Vicki Flenady, M.Med.Sc.           | Conference Chair<br>Perinatal Researcher                                | Australia      |
| <b>Iran University of Medical Sciences</b>                                                                   | Simin Taavoni, M.Sc.               | Senior Lecturer and Midwife                                             | Iran           |
| <b>March of Dimes</b>                                                                                        | Jennifer Howse, Ph.D.              | President                                                               | USA            |
| <b>March of Dimes</b>                                                                                        | Chris Howson, Ph.D.                | Vice President Global Programs                                          | USA            |
| <b>March of Dimes</b>                                                                                        | Doug Staples                       | Senior Vice President of Marketing and Communications                   | USA            |
| <b>March of Dimes</b>                                                                                        | Marina Weiss, Ph.D.                | Senior Vice President of Public Policy and Government Affairs           | USA            |
| <b>McGill University of Medicine, Departments of Pediatrics and Epidemiology and Biostatistics<br/>GAPPS</b> | Michael Kramer, M.D.               | James McGill Professor<br><br>SAC Member                                | Canada         |
| <b>Norwegian Agency for Development Cooperation (NORAD)</b>                                                  | Helga Fogstad, M.H.A.              | Coordinator, MNCH, Global Health and AIDS Department                    | Norway         |
| <b>Obafemi Awolowo University<br/>Department of Obstetrics, Gynecology and Perinatology</b>                  | Femi Kuti, M.B.B.S,<br>F.R.C.O.G.  | Researcher                                                              | Nigeria        |
| <b>PATH</b>                                                                                                  | Scott Jackson, M.B.A.,<br>C.F.R.E. | Senior Vice President of External Relations                             | USA            |

| <b>Organization/Affiliation</b>                                                                                     | <b>Name</b>                                            | <b>Title</b>                                            | <b>Country</b> |
|---------------------------------------------------------------------------------------------------------------------|--------------------------------------------------------|---------------------------------------------------------|----------------|
| <b>PATH</b>                                                                                                         | Rachel Wilson, M.P.H.                                  | Director of Policy and Advocacy                         | USA            |
| <b>Partnership for Maternal, Newborn and Child Health</b>                                                           | Andres de Francisco, M.D., Ph.D., M.Sc., D.T.M.&H.     | Special Adviser, Strategy and Scientific Policy         | Switzerland    |
| <b>Peking University<br/>GAPPS, Scientific Advisory Council</b>                                                     | Pang Ruyan, M.D., M.P.H.                               | Visiting Professor of Public Health<br>SAC Member       | China          |
| <b>Pregnancy &amp; Perinatology Branch, National Institute of Child Health &amp; Human Development (NICHD), NIH</b> | Uma Reddy, M.D., M.P.H.                                | Extramural Program Staff                                | USA            |
| <b>Pregnancy &amp; Perinatology Branch, National Institute of Child Health &amp; Human Development (NICHD), NIH</b> | Catherine Spong, M.D.                                  | Branch Manager                                          | USA            |
| <b>Save the Children, Bolivia</b>                                                                                   | Bertha Pooley, M.P.H.                                  | National Advisor                                        | Bolivia        |
| <b>Save the Children, Saving Newborn Lives</b>                                                                      | O. Masee Bateman, M.D., D.T.M&H.                       | Director                                                | USA            |
| <b>Save the Children, Saving Newborn Lives<br/>GAPPS, Core Investigator</b>                                         | Joy Lawn, BMedSci, M.B. B.S., M.R.C.P. (Paeds), M.P.H. | Senior Research and Policy Adviser<br>Core Investigator | South Africa   |
| <b>Syracuse University, Maxwell School of Citizenship and Public Affairs</b>                                        | Jeremy Shiffman, M.A., Ph.D.                           | Associate Professor of Public Administration            | USA            |
| <b>UNFPA</b>                                                                                                        | Luc de Bernis, M.D.                                    | Senior Advisor for Maternal Health in Africa            | Kenya          |
| <b>UNFPA</b>                                                                                                        | Katja Iversen                                          | Media Officer                                           | USA            |
| <b>UNICEF</b>                                                                                                       | Brian Hansford                                         | Communications Specialist                               | USA            |

| <b>Organization/Affiliation</b>                                        | <b>Name</b>                    | <b>Title</b>                                        | <b>Country</b> |
|------------------------------------------------------------------------|--------------------------------|-----------------------------------------------------|----------------|
| <b>UNICEF</b>                                                          | Mark Young, M.D., M.H.Sc.      | Senior Health Advisor                               | USA            |
| <b>US Congress</b>                                                     | Rep. Peter King, J.D.          | Representative (R-NY)                               | USA            |
| <b>US Congress</b>                                                     | Sen. Frank Lautenberg          | Senator (D-NJ)                                      | USA            |
| <b>US Congress</b>                                                     | Erin Fogarty                   | Mother of a stillborn; assisting with the SUID Bill | USA            |
| <b>World Bank, Human Development Network</b>                           | Joy Phumaphi                   | Vice President and Network Head                     | USA            |
| <b>World Health Organization, Department of Making Pregnancy Safer</b> | Marie-Agnès Heine              | Communications Officer                              | Switzerland    |
| <b>World Health Organization, Department of Making Pregnancy Safer</b> | Monir Islam, M.D., M.P.H.      | Director                                            | Switzerland    |
| <b>White Ribbon Alliance for Safe Motherhood</b>                       | Theresa Shaver, M.P.H., R.N.M. | Director                                            | USA            |
